# Supplementary material for: Colorectal surveillance outcomes from an institutional longitudinal cohort of lynch syndrome carriers
Source: PubMed Central journal article supplement (PMC10164917; doi:10.3389/fonc.2023.1146825), 2023-04-24
Supplement: Table_1.pdf [file Table_1.pdf]

**Supplementary Table 1.** History of Colorectal and Small Bowel Surgeries Based on MMR Gene. Note that patients can have more than one type of surgery.

| <b>Surgery</b>                  | <b><i>MLH1</i></b> | <b><i>MSH2/EPCAM</i></b> | <b><i>MSH6</i></b> | <b><i>PMS2</i></b> | <b><i>P-Value</i></b> |
|---------------------------------|--------------------|--------------------------|--------------------|--------------------|-----------------------|
| Right hemicolectomy             | 17 (56.7%)         | 12 (46.2%)               | 6 (60.0%)          | 2 (33.3%)          | <0.001                |
| Total Colectomy with Ileostomy  | 0 (0%)             | 2 (7.7%)                 | 0 (0%)             | 0 (0%)             | <0.001                |
| Total Colectomy with Ileorectal | 4 (13.3%)          | 0 (0%)                   | 0 (0%)             | 0 (0%)             | <0.001                |
| Left hemicolectomy              | 3 (10.0%)          | 1 (3.8%)                 | 0 (0%)             | 1 (16.7%)          | <0.001                |
| Sigmoid colon resection         | 1 (3.3%)           | 4 (15.4%)                | 0 (0%)             | 0 (0%)             | <0.001                |
| Other colorectal surgeries      | 4 (13.3%)          | 6 (23.1%)                | 3 (30.0%)          | 3 (50.0%)          | <0.001                |
| Small bowel surgeries           | 1 (3.3%)           | 1 (3.8%)                 | 1 (1.0%)           | 0 (0%)             | 0.002                 |
