# Supplementary material for: Colorectal surveillance outcomes from an institutional longitudinal cohort of lynch syndrome carriers
Source: PubMed Central journal article supplement (PMC10164917; doi:10.3389/fonc.2023.1146825), 2023-04-24
Supplement: Table_2.pdf [file Table_2.pdf]

**Supplementary Table 2.** History of Colorectal and Small Bowel Surgeries Based on Patient Status at Time of Enrollment (Previvor vs. Active Cancer and Survivor). Note that patients can have more than one type of surgery.

| <b>Surgery</b>                              | <b>Previvor N=50</b> | <b>Active Cancer/Survivor N=112</b> | <b>P-Value</b> |
|---------------------------------------------|----------------------|-------------------------------------|----------------|
| No Surgical History                         | 49 (98.0%)           | 43 (38.4%)                          | <0.001         |
| Right hemicolectomy                         | 0 (0%)               | 35 (31.3%)                          | <0.001         |
| Total Colectomy with Ileostomy              | 0 (0%)               | 1 (0.9%)                            | 0.001          |
| Total Colectomy with Ileorectal Anastomosis | 0 (0%)               | 4 (3.6%)                            | 0.003          |
| Left hemicolectomy                          | 0 (0%)               | 6 (5.4%)                            | 0.001          |
| Sigmoid colon resection                     | 0 (0%)               | 5 (4.5%)                            | <0.001         |
| Other colorectal surgeries                  | 0 (0%)               | 16 (14.3%)                          | 0.536          |
| Small bowel surgeries                       | 1 (2.0%)             | 2 (1.8%)                            | 0.134          |
